# Supplementary material for: Imaging cholesterol depletion at the plasma membrane by methyl-β-cyclodextrin
Source: PubMed Central journal article supplement (PMC8281586; doi:10.1016/j.jlr.2021.100077), 2021-04-21

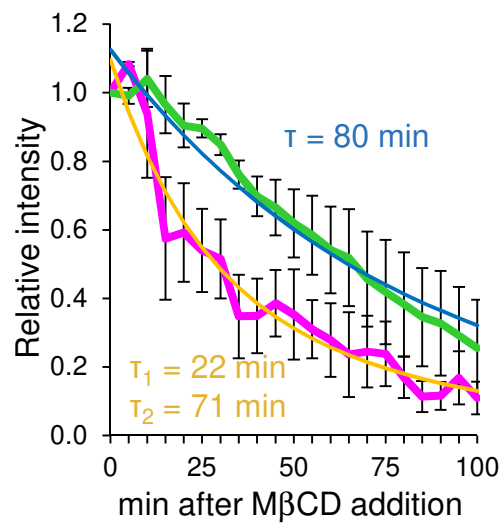

Supplement: mmc3.pdf [file mmc3.pdf]
