# Supplementary material for: Imaging cholesterol depletion at the plasma membrane by methyl-β-cyclodextrin
Source: PubMed Central journal article supplement (PMC8281586; doi:10.1016/j.jlr.2021.100077), 2021-04-21

Abe and Kobayashi Suppl. Fig. 2

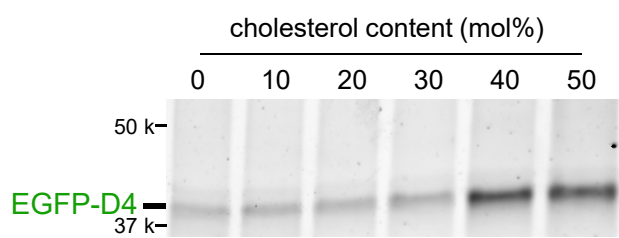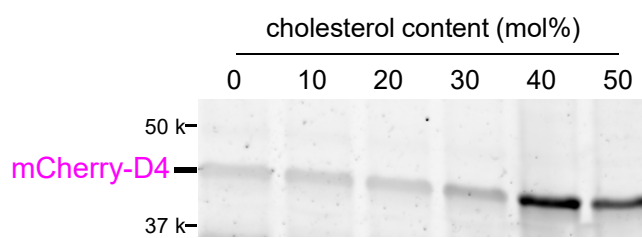

Supplement: mmc4.pdf [file mmc4.pdf]
